# Supplementary material for: The Hot Pepper (Capsicum annuum) MicroRNA Transcriptome Reveals Novel and Conserved Targets: A Foundation for Understanding MicroRNA Functional Roles in Hot Pepper
Source: PLoS One. 2013 May 30;8(5):e64238. doi: 10.1371/journal.pone.0064238 (PMC3667847; doi:10.1371/journal.pone.0064238)
Supplement: Table S1 — Predicted targets of conserved miRNAs. (XLSX) [file pone.0064238.s006.xlsx]

## Sheet: Sheet1
Conserved miRNA	S	Predicted targets	Contig number	Reference species
can-miR156a-c	3.5	acyltransferase-like protein	contig147384	Nicotiana tabacum
can-miR156a-c	4	LIGULELESS1 protein, putative	contig54463	Ricinus communis
can-miR156a-c	3	LIGULELESS1 protein, putative	contig19492	Ricinus communis
can-miR156a-c	2	transcription factor squamosa promoter binding protein-like	contig18156	Eucalyptus grandis
can-miR156a-c	2	LIGULELESS1 protein, putative	contig100837	Ricinus communis
can-miR156a-c	2	promoter-binding protein SPL9	contig37108	Vitis vinifera
can-miR156a-c	1	squamosa promoter-binding protein - CNR	contig028331	Solanum lycopersicum
can-miR156d-g	2	LIGULELESS1 protein, putative	contig54463	Ricinus communis
can-miR156d-g	1	LIGULELESS1 protein, putative	contig19492	Ricinus communis
can-miR156d-g	1	LIGULELESS1 protein, putative	contig18156	Ricinus communis
can-miR156d-g	3	DNA topoisomerase family protein	contig30043	Arabidopsis thaliana
can-miR156d-g	1	squamosa promoter-binding protein	contig100837	Citrus trifoliata
can-miR156d-g	1	promoter-binding protein SPL9	contig37108	Vitis vinifera
can-miR156d-g	4	squamosa promoter-binding protein - CNR	contig028331	Solanum lycopersicum
can-miR156h	2	LIGULELESS1 protein	contig54463	Ricinus communis
can-miR156h	1.5	LIGULELESS1 protein	contig19492	Ricinus communis
can-miR156h	1.5	LIGULELESS1 protein	contig18156	Ricinus communis
can-miR156h	1.5	LIGULELESS1 protein	contig100837	Ricinus communis
can-miR156h	1.5	LIGULELESS1 protein	contig37108	Ricinus communis
can-miR156h	3	squamosa promoter-binding protein - CNR	contig028331	Solanum lycopersicum
can-miR159a-c	4	myb-related transcription factor	contig70738	Solanum lycopersicum
can-miR159a-c	3.5	calcium-binding EF hand family protein	contig129062	Arabidopsis lyrata subsp. lyrata
can-miR159a-c	4	GRAS family transcription factor	contig40764	Populus trichocarpa
can-miR159a-c	3.5	r2r3-myb transcription factor, putative	contig26201	Ricinus communis
can-miR159a-c	4	putative glycosyltransferase	contig18946	Solanum aculeatissimum
can-miR159a-c	2.5	GAMyb-like1	contig47618	Solanum lycopersicum
can-miR159a-c	3	GAMYB-like2	contig13167	Solanum lycopersicum
can-miR159a-c	4	NHL repeat-containing protein	contig52923	Arabidopsis thaliana
can-miR159a-c	4	polyprotein	contig47885	Glycine max
can-miR159a-c	3.5	r2r3-myb transcription factor, putative	contig98644	Ricinus communis
can-miR160	0.5	putative auxin response factor ARF16	contig38896	Malus x domestica
can-miR160	1	auxin response factor 10	contig39065	Solanum lycopersicum
can-miR160	1	Auxin response factor, putative	contig10018	Ricinus communis
can-miR160	1.5	auxin response factor 17	contig62966	Solanum lycopersicum
can-miR164a-b	4	UNE6 (unfertilized embryo sac 6)	contig47973	Arabidopsis thaliana
can-miR164a-b	4	vesicle-associated membrane protein-related	contig41905	Arabidopsis thaliana
can-miR164a-b	4	NAC domain-containing protein 21/22, putative	contig12364	Ricinus communis
can-miR164a-b	3	NO APICAL MERISTEM	contig71511	Solanum lycopersicum
can-miR164a-b	4	NAC domain-containing protein 21/22, putative	contig173938	Ricinus communis
can-miR164a-b	3.5	lipase-related	contig42239	Arabidopsis thaliana
can-miR164a-b	4	Putative late blight resistance protein, identical	contig21360	Solanum demissum
can-miR164a-b	4	DP-glucuronate decarboxylase 1	contig13857	Nicotiana tabacum
can-miR164c	3.5	NO APICAL MERISTEM	contig71511	Solanum lycopersicum
can-miR164c	3.5	zinc finger (C3HC4-type RING finger) family protein	contig75613	Arabidopsis thaliana
can-miR164c	4	lipase-related	contig42239	Arabidopsis thaliana
can-miR166i-j	4	Cyclic nucleotide-gated ion channel, putative	contig89952	Ricinus communis
can-miR167a-c	2.5	multidrug resistance pump, putative	contig82999	Ricinus communis
can-miR167d	3.5	DNA binding protein, putative	contig80506	Ricinus communis
can-miR167d	4	multidrug resistance pump, putative	contig82999	Ricinus communis
can-miR168a-b	4	oxidoreductase family protein	contig145238	Arabidopsis lyrata subsp. lyrata
can-miR168a-b	4	AGO1	contig45783	Nicotiana benthamiana
can-miR168c	3	AGO1	contig45783	Nicotiana benthamiana
can-miR169a-g	4	replication factor A 1, rfa1, putative	contig96185	Ricinus communis
can-miR169a-g	4	beta-mannosidase enzyme	contig68856	Solanum lycopersicum
can-miR171a-e	1	GRAS family transcription factor	contig12271	Populus trichocarpa
can-miR171a-e	1	GRAS family transcription factor	contig76255	Populus trichocarpa
can-miR171a-e	1	GRAS family transcription factor	contig72987	Populus trichocarpa
can-miR171f-g	3.5	transmembrane receptor	contig61587	Arabidopsis thaliana
can-miR171f-g	1.5	GRAS family transcription factor	contig12271	Populus trichocarpa
can-miR171f-g	1.5	GRAS family transcription factor	contig76255	Populus trichocarpa
can-miR171f-g	1.5	GRAS family transcription factor	contig72987	Populus trichocarpa
can-miR171h	0	GRAS family transcription factor	contig29755	Populus trichocarpa
can-miR171h	3	protein serine/threonine kinase	contig15157	Arabidopsis thaliana
can-miR171i	4	Tyrosine recombinase XerC	contig134593	Limnobacter sp. MED105
can-miR171i	4	GRAS family transcription factor	contig12271	Populus trichocarpa
can-miR171i	1	GRAS family transcription factor	contig76255	Populus trichocarpa
can-miR171i	1	GRAS family transcription factor	contig72987	Populus trichocarpa
can-miR171i	3	GRAS family transcription factor	contig29755	Populus trichocarpa
can-miR171i	4	riboflavin kinase/fmn adenylyltransferase, putative	contig104304	Ricinus communis
can-miR171i	3	zinc finger protein	contig38571	Nicotiana benthamiana
can-miR171j	1	GRAS family transcription factor	contig76255	Populus trichocarpa
can-miR171j	3.5	GRAS family transcription factor	contig29755	Populus trichocarpa
can-miR171j	3.5	zinc finger protein	contig38571	Nicotiana benthamiana
can-miR171k	3.5	HIPL1 protein precursor, putative	contig37794	Ricinus communis
can-miR171k	1.5	GRAS family transcription factor	contig12271	Populus trichocarpa
can-miR171k	3	GRAS family transcription factor	contig76255	Populus trichocarpa
can-miR171k	3	GRAS family transcription factor	contig72987	Populus trichocarpa
can-miR171l	3.5	GRAS family transcription factor	contig12271	Populus trichocarpa
can-miR171l	2	GRAS family transcription factor	contig76255	Populus trichocarpa
can-miR171l	2	GRAS family transcription factor	contig72987	Populus trichocarpa
can-miR171l	4	GRAS family transcription factor	contig29755	Populus trichocarpa
can-miR171l	3.5	zinc finger protein	contig38571	Nicotiana benthamiana
can-miR172a-d	3	Helix-loop-helix DNA-binding	contig107472	Medicago truncatula
can-miR172a-d	4	DNA-repair protein UVH3, putative	contig135847	Ricinus communis
can-miR172a-d	3.5	serine/threonine protein kinase, putative	contig10365	Ricinus communis
can-miR172a-d	3.5	exostosin family protein	contig13067	Arabidopsis thaliana
can-miR172a-d	2	apetala 2-like protein	contig71308	Nicotiana tabacum
can-miR172a-d	2	apetala 2-like protein	contig120692	Nicotiana tabacum
can-miR172a-d	4	symbiotic ammonium transporter	contig8984	Glycine max
can-miR172a-d	3	transcription factor APETALA2	contig61069	Citrus trifoliata
can-miR172a-d	3	AP2 domain-containing transcription factor	contig95379	Populus trichocarpa
can-miR172e	4	NADH-ubiquinone oxidoreductase B8 subunit, putative	contig52130	Arabidopsis thaliana
can-miR172e	4	methylase family protein	contig24207	Arabidopsis thaliana
can-miR172e	4	ATP binding protein, putative	contig11670	Ricinus communis
can-miR172e	4	Helix-loop-helix DNA-binding	contig107472	Medicago truncatula
can-miR172e	4	ubiquitin-protein ligase	contig95356	Cucumis melo subsp. melo
can-miR172e	4	DNA-repair protein UVH3, putative	contig135847	Ricinus communis
can-miR172e	3	apetala 2-like protein	contig71308	Nicotiana tabacum
can-miR172e	3	apetala 2-like protein	contig120692	Nicotiana tabacum
can-miR172e	3	transcription factor APETALA2	contig61069	Vitis vinifera
can-miR172e	3	transcription factor APETALA2	contig95379	Vitis vinifera
can-miR172f	4	Putative mudrA protein - maize transposon MuDR	contig62985	Oryza sativa
can-miR172f	4	methylase family protein	contig24207	Arabidopsis thaliana
can-miR172f	4	Helix-loop-helix DNA-binding	contig107472	Medicago truncatula
can-miR172f	4	MO25 protein -related	contig27846	Brassica oleracea
can-miR172f	4	rginine decarboxylase	contig38499	Solanum lycopersicum
can-miR172f	4	WD-40 repeat protein	contig39865	Solanum lycopersicum
can-miR172f	4	S-locus receptor kinase	contig16607	Olea europaea
can-miR172f	4	serine/threonine protein kinase, putative	contig10365	Ricinus communis
can-miR172f	4	xostosin family protein	contig13067	Arabidopsis thaliana
can-miR172f	3.5	DEAD/DEAH box helicase, putative	contig74806	Arabidopsis thaliana
can-miR172f	1	AP2 domain-containing transcription factor	contig71308	Populus trichocarpa
can-miR172f	1	apetala 2-like protein	contig120692	Nicotiana tabacum
can-miR172f	2	transcription factor APETALA2	contig61069	Vitis vinifera
can-miR172f	2	transcription factor APETALA2	contig95379	Vitis vinifera
can-miR172g	3	phospholipase PLDa1	contig85929	Solanum lycopersicum
can-miR172g	4	phospholipase PLDa1	contig51348	Solanum lycopersicum
can-miR172g	4	BC-type transport-like protein	contig12758	Arabidopsis thaliana
can-miR172g	2.5	protein kinase family protein	contig40712	Arabidopsis thaliana
can-miR172g	4	RNA splicing factor, transesterification mechanism	contig43454	Arabidopsis thaliana
can-miR172g	3.5	ATP binding protein, putative	contig11670	Ricinus communis
can-miR172g	2.5	Helix-loop-helix DNA-binding	contig107472	Medicago truncatula
can-miR172g	4	pre-mRNA-processing factor 39	contig53675	Arabidopsis thaliana
can-miR172g	4	protein binding / zinc ion binding	contig186861	Arabidopsis thaliana
can-miR172g	4	pentatricopeptide (PPR) repeat-containing protein	contig63006	Arabidopsis thaliana
can-miR172g	3.5	pentatricopeptide (PPR) repeat-containing protein	contig118603	Arabidopsis thaliana
can-miR172g	3.5	polyadenylate-binding protein, putative	contig39978	Ricinus communis
can-miR172g	4	ATP binding protein, putative	contig67551	Ricinus communis
can-miR172g	4	3'-5'-exoribonuclease/ RNA binding	contig65814	Arabidopsis thaliana
can-miR172g	4	acuolar sorting protein, putative	contig22927	Ricinus communis
can-miR172g	4	MCM protein-like protein	contig29171	Nicotiana tabacum
can-miR172g	4	ubiquitin-protein ligase	contig95356	Cucumis melo subsp. melo
can-miR172g	3	DNA-repair protein UVH3, putative	contig135847	Ricinus communis
can-miR172g	4	LMBR1 integral membrane family protein	contig48354	Arabidopsis thaliana
can-miR172g	3.5	RWP-RK domain-containing protein	contig59641	Arabidopsis lyrata subsp. lyrata
can-miR172g	3.5	rginine decarboxylase	contig38499	Solanum lycopersicum
can-miR172g	4	DNA binding	contig52094	Arabidopsis thaliana
can-miR172g	4	LBD21 (LOB DOMAIN-CONTAINING PROTEIN 21)	contig31605	Arabidopsis thaliana
can-miR172g	4	cytochrome P450	contig82103	Coptis japonica var. dissecta
can-miR172g	3	P2 domain-containing transcription factor	contig95981	Populus trichocarpa
can-miR172g	2.5	exostosin family protein	contig13067	Arabidopsis thaliana
can-miR172g	4	aminophospholipid ATPase	contig53580	Populus trichocarpa
can-miR172g	4	PTF1 (PLASTID TRANSCRIPTION FACTOR 1); transcription factor	contig17903	Arabidopsis thaliana
can-miR172g	1.5	apetala 2-like protein	contig71308	Nicotiana tabacum
can-miR172g	1.5	apetala 2-like protein	contig120692	Nicotiana tabacum
can-miR172g	4	hydroxysteroid dehydrogenase, putative	contig9018	Ricinus communis
can-miR172g	2.5	transcription factor Myb	contig93467	Capsicum annuum
can-miR172g	1	transcription factor APETALA2	contig61069	Vitis vinifera
can-miR172g	1	transcription factor APETALA2	contig95379	Vitis vinifera
can-miR172h	3.5	axonemal dynein light chain, putative	contig53426	Ricinus communis
can-miR172h	4	vacuolar protein sorting-associated protein, putative	contig38940	Ricinus communis
can-miR172h	4	copper-binding family protein	contig66626	Arabidopsis thaliana
can-miR172h	4	cytochrome P450, putative	contig62115	Ricinus communis
can-miR172h	4	blight resistance protein RGA	contig65340	Capsicum annuum
can-miR172h	4	early tobacco anther 1	contig44873	Nicotiana tabacum
can-miR172h	3.5	EMB1047/FTSH12	contig163651	Arabidopsis lyrata subsp. lyrata
can-miR172h	2.5	secreted glycoprotein 3	contig55744	Ipomoea trifida
can-miR172h	3.5	UDP-glucosyltransferase, putative	contig46519	Ricinus communis
can-miR172h	4	apetala 2-like protein	contig71308	Nicotiana tabacum
can-miR172h	4	apetala 2-like protein	contig120692	Nicotiana tabacum
can-miR172h	3	Negative regulator of the PHO system, putative	contig28699	Ricinus communis
can-miR172h	4	phytochrome B	contig46060	Solanum tuberosum
can-miR172i	3.5	phospholipase PLDa1	contig85929	Solanum lycopersicum
can-miR172i	4	methylase family protein	contig24207	Arabidopsis thaliana
can-miR172i	4	DNA-repair protein UVH3, putative	contig135847	Ricinus communis
can-miR172i	1.5	apetala 2-like protein	contig71308	Nicotiana tabacum
can-miR172i	1.5	apetala 2-like protein	contig120692	Nicotiana tabacum
can-miR172i	1	transcription factor APETALA2	contig61069	Vitis vinifera
can-miR172i	1	transcription factor APETALA2	contig95379	Vitis vinifera
can-miR319a	3	phosphorylase family protein	contig25055	Arabidopsis thaliana
can-miR319a	4	GAMyb-like1	contig47618	Solanum lycopersicum
can-miR319b-c	2	phosphorylase family protein	contig25055	Arabidopsis thaliana
can-miR319b-c	4	GAMyb-like1	contig47618	Solanum lycopersicum
can-miR319b-c	2	anceolate	contig91393	Capsicum annuum
can-miR319b-c	4	deetiolated 1-like protein	contig50976	Solanum tuberosum
can-miR319e	3	GAMyb-like1	contig47618	Solanum lycopersicum
can-miR319e	4	GAMYB-like2	contig13167	Solanum lycopersicum
can-miR319e	4	lanceolate	contig29929	Capsicum annuum
can-miR319e	2	phosphorylase family protein	contig25055	Arabidopsis thaliana
can-miR319e	4	NHL repeat-containing protein	contig52923	Arabidopsis thaliana
can-miR319e	4	lanceolate	contig59510	Capsicum annuum
can-miR319e	3.5	putative transcription factor	contig15983	Solanum tuberosum
can-miR319e	3.5	putative transcription factor	contig132138	Solanum tuberosum
can-miR319f	1	phosphorylase family protein	contig25055	Arabidopsis thaliana
can-miR319f	4	GAMyb-like1	contig47618	Solanum lycopersicum
can-miR319f	3.5	lanceolate	contig29929	Capsicum annuum
can-miR319f	4	cytochrome P450	contig122587	Ipomoea nil
can-miR319f	4	amino acid transporter, putative	contig36139	Ricinus communis
can-miR319f	3.5	transcription factor, putative	contig91393	Ricinus communis
can-miR319f	3.5	lanceolate	contig59510	Capsicum annuum
can-miR319f	3.5	putative transcription factor	contig15983	Solanum tuberosum
can-miR319f	3.5	putative transcription factor	contig132138	Solanum tuberosum
can-miR319g	3.5	erine-threonine protein kinase, plant-type, putative	contig26837	Ricinus communis
can-miR319g	3.5	erine-threonine protein kinase, plant-type, putative	contig21086	Ricinus communis
can-miR319g	1	phosphorylase family protein	contig25055	Arabidopsis thaliana
can-miR319g	3	GAMyb-like1	contig47618	Solanum lycopersicum
can-miR319g	4	GAMyb-like1	contig13167	Solanum lycopersicum
can-miR319g	3	lanceolate	contig29929	Capsicum annuum
can-miR319g	4	cytochrome P450	contig122587	Ipomoea nil
can-miR319g	3.5	amino acid transporter, putative	contig36139	Ricinus communis
can-miR319g	4	NHL repeat-containing protein	contig52923	Arabidopsis thaliana
can-miR319g	3.5	transcription factor, putative	contig91393	Ricinus communis
can-miR319g	3	lanceolate	contig59510	Capsicum annuum
can-miR319g	4	TCP family transcription factor	contig35018	Cyclamen persicum
can-miR319g	2.5	putative transcription factor	contig15983	Solanum tuberosum
can-miR319g	2.5	putative transcription factor	contig132138	Solanum tuberosum
can-miR390a-b	3.5	internal-motor kinesin	contig36703	Nicotiana tabacum
can-miR390a-b	2.5	serine/threonine-protein kinase bri1, putative	contig30760	Ricinus communis
can-miR390c	2	putative leucine rich repeat-type serine/threonine receptor-like kinase	contig30760	Daucus carota
can-miR390c	4	eucine-rich repeat transmembrane protein kinase, putative	contig4007	Arabidopsis thaliana
can-miR390c	4	erine-threonine protein kinase, plant-type, putative	contig33804	Ricinus communis
can-miR390c	3	internal-motor kinesin	contig36703	Nicotiana tabacum
can-miR390c	4	leucine-rich repeat transmembrane protein kinase, putative	contig59854	Arabidopsis thaliana
can-miR390c	4	leucine rich repeat receptor kinase, putative	contig55613	Ricinus communis
can-miR390c	4	protein phosphatase, putative	contig5309	Ricinus communis
can-miR390c	4	serine-threonine protein kinase, plant-type, putative	contig66315	Ricinus communis
can-miR393a-b	2.5	TIR1-like protein	contig11388	Solanum lycopersicum
can-miR394a	1	F-box family protein	contig90221	Citrus trifoliata
can-miR394b	1	F-box family protein	contig90221	Citrus trifoliata
can-miR394b	4	ATP binding / microtubule motor	contig71222	Arabidopsis thaliana
can-miR395a-j	4	DRB2 (DSRNA-BINDING PROTEIN 2); double-stranded RNA binding	contig88981	Arabidopsis thaliana
can-miR395a-j	3.5	serine-threonine protein kinase, plant-type, putative	contig47921	Ricinus communis
can-miR395a-j	4	carotenoid isomerase	contig26580	Chrysanthemum x morifolium
can-miR395a-j	2	sulfate/bicarbonate/oxalate exchanger and transporter sat-1	contig93668	Populus trichocarpa
can-miR395a-j	2.5	sulfate/bicarbonate/oxalate exchanger and transporter sat-1	contig93668	Populus trichocarpa
can-miR395a-j	3	sulfate/bicarbonate/oxalate exchanger and transporter sat-1	contig47164	Populus trichocarpa
can-miR395a-j	3.5	sulfate adenylyltransferase	contig115984	Solanum tuberosum
can-miR396a	4	auxin response factor 8	contig31249	Solanum lycopersicum
can-miR396a	3	AtGRF4 (GROWTH-REGULATING FACTOR 4); transcription activator	contig34945	Arabidopsis thaliana
can-miR396a	3.5	putative DNA cytosine 5-methyltransferase	contig62566	Solanum lycopersicum
can-miR396a	3.5	putative DNA cytosine 5-methyltransferase	contig12814	Solanum lycopersicum
can-miR396a	3.5	putative DNA cytosine 5-methyltransferase	contig71344	Solanum lycopersicum
can-miR396a	4	zinc ion binding	contig12517	Arabidopsis thaliana
can-miR396a	3	AtGRF3 (GROWTH-REGULATING FACTOR 3); transcription activator	contig27996	Arabidopsis thaliana
can-miR396a	4	ceramidase family protein	contig127081	Arabidopsis thaliana
can-miR396a	3.5	UPA17	contig31409	Capsicum annuum
can-miR396a	4	zinc finger protein, putative	contig12354	Ricinus communis
can-miR396a	3	GRF domain class transcription factor	contig49785	Malus x domestica
can-miR396a	4	heat shock protein binding protein, putative	contig107258	Ricinus communis
can-miR396b	4	AtGRF4 (GROWTH-REGULATING FACTOR 4); transcription activator	contig34945	Arabidopsis thaliana
can-miR396b	2.5	putative DNA cytosine 5-methyltransferase	contig62566	Solanum lycopersicum
can-miR396b	2.5	putative DNA cytosine 5-methyltransferase	contig12814	Solanum lycopersicum
can-miR396b	2.5	putative DNA cytosine 5-methyltransferase	contig71344	Solanum lycopersicum
can-miR396b	4	glutamate decarboxylase isoform2	contig50380	Solanum lycopersicum
can-miR396b	4	putative WD-repeat protein	contig62539	Arabidopsis thaliana
can-miR396b	4	AtGRF3 (GROWTH-REGULATING FACTOR 3); transcription activator	contig27996	Arabidopsis thaliana
can-miR396b	4	polyadenylate-binding protein, putative	contig130240	Ricinus communis
can-miR396b	3.5	AtALMT9 (aluminum-activated malate transporter 9); anion channel	contig39961	Arabidopsis thaliana
can-miR396b	3.5	heat shock protein, putative	contig64961	Ricinus communis
can-miR396b	4	UPA17	contig31409	Capsicum annuum
can-miR396b	3.5	potyviral helper component protease-interacting protein 1	contig36062	Solanum tuberosum subsp. andigenum
can-miR396b	4	GRF domain class transcription factor	contig49785	Malus x domestica
can-miR396b	4	ring finger protein, putative	contig98452	Ricinus communis
can-miR396b	4	disease resistance protein BS2	contig37841	Capsicum chacoense
can-miR396c	2.5	ARGONAUTE 1	contig10003	Nicotiana tabacum
can-miR396c	4	GRF domain class transcription factor	contig15579	Malus x domestica
can-miR396c	4	AtGRF4 (GROWTH-REGULATING FACTOR 4); transcription activator	contig34945	Arabidopsis thaliana
can-miR396c	3.5	putative DNA cytosine 5-methyltransferase	contig62566	Solanum lycopersicum
can-miR396c	3.5	putative DNA cytosine 5-methyltransferase	contig12814	Solanum lycopersicum
can-miR396c	3.5	putative DNA cytosine 5-methyltransferase	contig71344	Solanum lycopersicum
can-miR396c	3.5	FRS5 (FAR1-related sequence 5); zinc ion binding	contig12517	Arabidopsis thaliana
can-miR396c	4	AtGRF3 (GROWTH-REGULATING FACTOR 3); transcription activator	contig27996	Arabidopsis thaliana
can-miR396c	3	UPA17	contig31409	Capsicum annuum
can-miR396c	4	GRF domain class transcription factor	contig49785	Malus x domestica
can-miR397a	4	3'-N-debenzoyl-2'-deoxytaxol N-benzoyltransferase, putative	contig31203	Ricinus communis
can-miR397a	1.5	diphenol oxidase	contig79248	Nicotiana tabacum
can-miR397a	2.5	diphenol oxidase	contig56069	Nicotiana tabacum
can-miR397a	2	diphenol oxidase	contig25519	Nicotiana tabacum
can-miR397a	2.5	laccase	contig154864	Solanum lycopersicum
can-miR397a	3	accase 110c	contig47024	Populus trichocarpa
can-miR397a	2.5	laccase 1a	contig43435	Populus trichocarpa
can-miR397a	2.5	laccase, putative	contig43540	Ricinus communis
can-miR397a	2.5	laccase, putative	contig44817	Ricinus communis
can-miR397a	3	LAC3 (laccase 3); laccase	contig91032	Arabidopsis thaliana
can-miR397a	3	laccase 110b	contig11422	Populus trichocarpa
can-miR397b	4	subtilase family protein	contig64018	Arabidopsis thaliana
can-miR397b	2	diphenol oxidase	contig79248	Nicotiana tabacum
can-miR397b	3	diphenol oxidase	contig56069	Nicotiana tabacum
can-miR397b	2	diphenol oxidase	contig25519	Nicotiana tabacum
can-miR397b	2	laccase	contig154864	Solanum lycopersicum
can-miR397b	4	laccase 1a	contig43435	Populus trichocarpa
can-miR397b	4	laccase, putative	contig43540	Ricinus communis
can-miR397b	4	laccase, putative	contig44817	Ricinus communis
can-miR397b	3.5	ankyrin repeat family protein	contig187450	Arabidopsis thaliana
can-miR397b	4	RNA-binding region RNP-1 (RNA recognition motif)	contig13618	Medicago truncatula
can-miR397b	1.5	laccase	contig91032	Arabidopsis thaliana
can-miR397b	4	laccase 110b	contig11422	Populus trichocarpa
can-miR398c	3.5	short-chain dehydrogenase/reductase	contig4595	Cucumis melo subsp. melo
can-miR398c	3.5	myb family transcription factor	contig67120	Arabidopsis thaliana
can-miR399a-e	4	two component sensor kinase	contig20508	Agrobacterium tumefaciens str. C58
can-miR399a-e	4	Nucleotide pyrophosphatase/phosphodiesterase, putative	contig39204	Ricinus communis
can-miR399a-e	3.5	protein kinase family protein	contig56987	Arabidopsis thaliana
can-miR399f-g	2.5	inorganic phosphate transporter	contig116462	Solanum lycopersicum
can-miR399f-g	3	inorganic phosphate transporter	contig75260	Solanum lycopersicum
can-miR408a	4	phosphoglucomutase, putative	contig34741	Ricinus communis
can-miR408b	4	phosphoglucomutase, putative	contig34741	Ricinus communis
can-miR408b	3	laccase 90c	contig24094	Populus trichocarpa
can-miR408b	3	laccase 90a	contig41016	Populus trichocarpa
can-miR408b	4	CYP72A56	contig20398	Nicotiana tabacum
can-miR482b	3	nematode resistance-like protein	contig18574	Solanum tuberosum
can-miR482c	3	resistance protein PSH-RGH6	contig23981	Solanum tuberosum
can-miR482d	4	resistance protein PSH-RGH6	contig23981	Solanum tuberosum
can-miR482d	4	resistance protein PSH-RGH6	contig52306	Solanum tuberosum
can-miR482d	3.5	nematode resistance-like protein	contig37557	Solanum tuberosum
can-miR482d	3	bacterial spot disease resistance protein 4	contig44629	Solanum lycopersicum
can-miR482d	4	disease resistance protein Gpa2	contig37615	Solanum tuberosum
can-miR482e	3.5	peptidase M3 family protein / thimet oligopeptidase family protein	contig58094	Arabidopsis thaliana
can-miR482e	3.5	bacterial spot disease resistance protein 4	contig36081	Solanum lycopersicum
can-miR482e	4	Carotenoid isomerase, chloroplast precursor, putative	contig26580	Ricinus communis
can-miR482f	4	PR-protein	contig67299	Capsicum annuum
can-miR482f	4	RRP6-like protein 2	contig34928	Arabidopsis thaliana
can-miR482f	4	20S proteasome alpha 6 subunit	contig5968	Nicotiana benthamiana
can-miR482f	2.5	blight resistance protein RGA3	contig34664	Solanum bulbocastanum
can-miR482f	3	blight resistance protein RGA3	contig39533	Solanum bulbocastanum
can-miR482f	4	nematode resistance-like protein	contig9265	Solanum tuberosum
can-miR482f	4	nematode resistance-like protein	contig2843	Solanum tuberosum
can-miR530	3.5	SlTCP3	contig29929	Solanum lycopersicum
can-miR530	4	80 kD MCM3-associated protein, putative	contig40759	Ricinus communis
can-miR530	1	TZP; DNA binding / nucleic acid binding / zinc ion binding	contig77398	Arabidopsis thaliana
can-miR530	3.5	ukaryotic translation initiation factor 3 subunit, putative	contig27128	Ricinus communis
can-miR530	4	PFK5 (PHOSPHOFRUCTOKINASE 5); 6-phosphofructokinase	contig40506	Arabidopsis thaliana
can-miR530	3.5	Galactose oxidase precursor, putative	contig55174	Ricinus communis
can-miR827	4	egulator of chromosome condensation (RCC1) family protein	contig23691	Arabidopsis thaliana
can-miR827	4	chaperone protein dnaJ-related	contig15445	Arabidopsis thaliana
can-miR827	4	S-locus lectin protein kinase family protein	contig58571	Glycine max
can-miR1446a-b	3	GRAS family transcription factor	contig32571	Populus trichocarpa
can-miR4376	4	casein kinase, putative	contig20369	Ricinus communis
can-miR4414a	4	heat shock protein binding protein, putative	contig18406	Ricinus communis
can-miR4414a	4	ABC transporter ATP-binding protein	contig101884	Listeria monocytogenes Clip81459
can-miR4414a	3.5	TOC159 (TRANSLOCON AT THE OUTER ENVELOPE MEMBRANE OF CHLOROPLASTS 159); transmembrane receptor	contig81015	Arabidopsis thaliana
can-miR4414b	2.5	regulator of chromosome condensation (RCC1) family protein	contig60556	Arabidopsis thaliana
can-miR4414b	3.5	phosphoribulokinase/uridine kinase family protein	contig30877	Arabidopsis thaliana
can-miR4414b	0	peroxin-3 family protein	contig36139	Arabidopsis thaliana
can-miR4414b	4	putative auxin-regulated protein	contig61950	Oryza sativa Japonica Group
