# Supplementary material for: The Hot Pepper (Capsicum annuum) MicroRNA Transcriptome Reveals Novel and Conserved Targets: A Foundation for Understanding MicroRNA Functional Roles in Hot Pepper
Source: PLoS One. 2013 May 30;8(5):e64238. doi: 10.1371/journal.pone.0064238 (PMC3667847; doi:10.1371/journal.pone.0064238)
Supplement: Table S2 — Probe sequences used for northern blot analysis. (XLSX) [file pone.0064238.s007.xlsx]

## Sheet: Sheet1
miRNA	probe sequence(5'→3')
can-miR156a-c	GTGCTCTCTATCTTCTGTCAA
can-miR159a-c	TAGAGCTCCCTTCAATCCAAA
can-miR160	TGGCATACAGGGAGCCAGGCA
can-miR162a-e	CCGGATGCAGAGGTTTATCGA
can-miR164a-b	TGCACGTGCCCTGCTTCTCCA
can-miR166a-h	GGGGAATGAAGCCTGGTCCGA
can-miR167a-c	TAGATCATGCTGGCAGCTTCA
can-miR168c	TTCCCGACCTGCACCAAGCGA
can-miR171a-e	GATATTGGCACGGCTCAATCA
can-miR319a	GGGAGCTCCCTTCAGTCCAA
can-miR390a-b	GGCGCTATCCCTCCTGAGCTT
can-miR394a	GGAGGTGGACAGAATGCCAA
can-miR395a-j	GAGTTCCCCCAAACACTTCAG
can-miR396b	AAGTTCAAGAAAGCTGTGGAA
can-miR398a-b	CAGGGGCGACCTGAGAACACA
can-miR403	CGAGTTTGTGCGTGAATCTAA
can-miR408a	AGCCAGGGAAGAGGCAGTGCA
can-miR477	CAGAAGCCTTTGAGGGAGAGT
can-miR530	CAGGTGCAGGTGCAAATGCA
can-miR-n001	AGGCCTACTATCAAAACAGAAA
can-miR-n002a-c	ACGATTCAGGTGTGTTTGCAA
can-miR-n003a	AATAGAATGGCTACAACTACA
can-miR-n004	AACAACTTGTGCTCGATCTTA
can-miR-n005	GCGATTCAGGTGCGTATCGAA
can-miR-n006	AAAGCCCAAAGGATGATTGTTG
can-miR-n007	GCAACTCACCTGAAGGTTCAA
can-miR-n008	TTCTCAATATTTTCTCTCATGCCG
can-miR-n009a,b-3p	TCCCTGAACGGAACAATACCA
can-miR-n010	CGTGTTGAACTTATCTCATAA
can-miR-n013	GGGAAAACAACTCTTGCTAAAA
can-miR-n014	GACAACAGTAACGAACTTCAG
can-miR-n015	AGTTTTTCGTTTCTCAGGCCTGAA
can-miR-n016a-b	GCTGTGGACGATGTATTGGAT
can-miR-n017	ACTCGACATAGCGTTGCTTAG
can-miR-n026	TGGGATGGAGTTCATTGTGACA
can-miR-n027	GTTGGCATCGACAACTTTCAT
can-miR-n030	TATGCTACTGACGGTCCTCGAA
can-miR-n032	AGTGGCTTATCTACAGGAACA
can-miR-n033	ACCTGAAGCCATGCTTTCTCTA
